# Supplementary material for: Pyrenyl-functionalized ferrocenes for multisignaling recognition of anions
Source: Royal Society of Chemistry journal article supplement (doi:10.1039/c5nj01995h), 2015-01-01
Supplement: c5nj01995h1.pdf [file c5nj01995h1.pdf]

## Supported information

# Pyrenyl-functionalized Ferrocenes for Multisignaling Recognition of Anions

Li Zhou, Xiang-Tian Fang, Yu-Di Xu, Qian-Yong Cao<sup>a, b, \*</sup>,

<sup>a</sup>Department of Chemistry, Nanchang University, Nanchang 330031, China

<sup>b</sup>Jiangxi Provincial Key Laboratory of New Energy Chemistry, Nanchang 330031, P. R. Chin

Corresponding author. Tel: +86 791 83969514 fax: +86 791 83969514

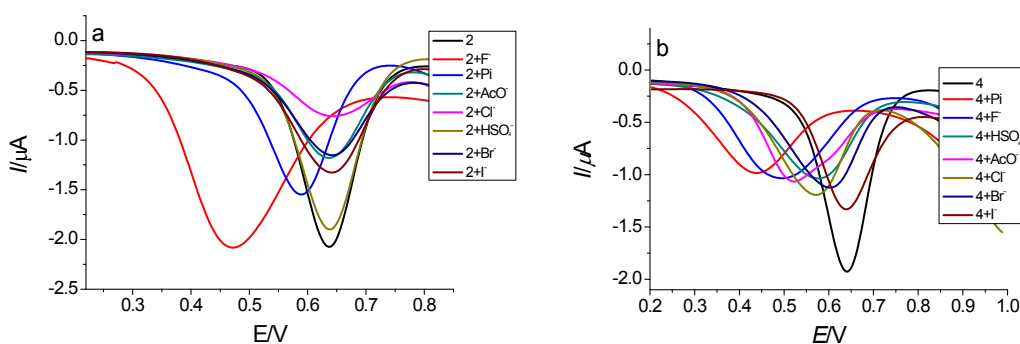

**Fig. S1** DPV profile of **2** (a) and **4** (b) upon the addition of equal equiv of (5 equiv) anions in CH<sub>3</sub>CN solution

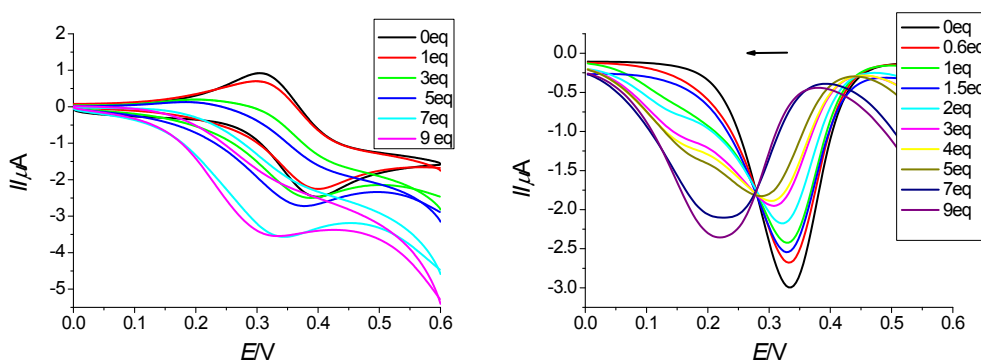

**Fig. S2** CV and DPV titration profile of **1** (0.2 mM) upon addition of various amount of F<sup>-</sup> in

CH<sub>3</sub>CN solution. Reference electrode = Ag/AgNO<sub>3</sub>; supporting electrolyte = [n-Bu<sub>4</sub>N]PF<sub>6</sub> (0.1 M); scan rate = 100 mV S<sup>-1</sup>.

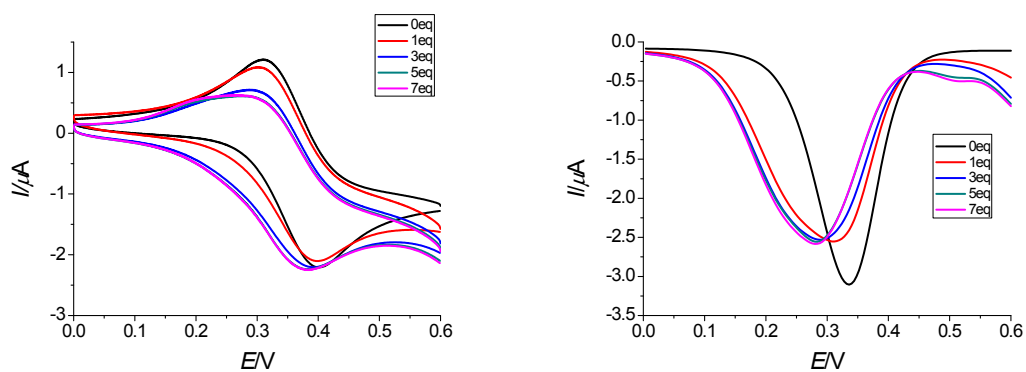

**Fig. S3** CV and DPV titration profile of **1** (0.2 mM) upon addition of various amount of Pi in CH<sub>3</sub>CN solution. Reference electrode = Ag/AgNO<sub>3</sub>; supporting electrolyte = [n-Bu<sub>4</sub>N]PF<sub>6</sub> (0.1 M); scan rate = 100 mV S<sup>-1</sup>.

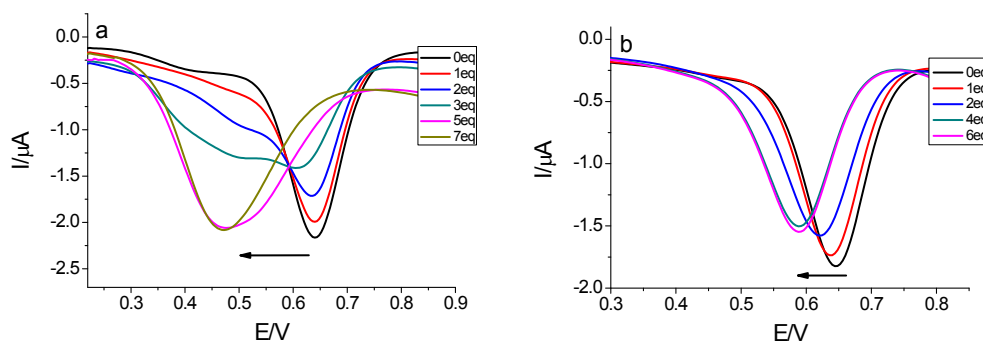

**Fig. S4** DPV titration profile of **2** (0.2 mM) upon addition of various amount of F<sup>-</sup> (a) and Pi (b) in CH<sub>3</sub>CN solution. Reference electrode = Ag/AgNO<sub>3</sub>; supporting electrolyte = [n-Bu<sub>4</sub>N]PF<sub>6</sub> (0.1 M); scan rate = 100 mV S<sup>-1</sup>.

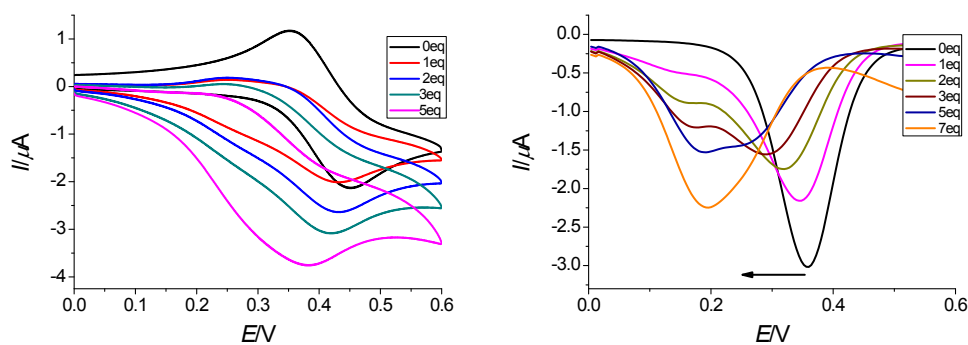

**Fig. S5** CV and DPV titration profile of **3** (0.2 mM) upon addition of various amount of F<sup>-</sup> in CH<sub>3</sub>CN solution. Reference electrode = Ag/AgNO<sub>3</sub>; supporting electrolyte = [n-Bu<sub>4</sub>N]PF<sub>6</sub> (0.1 M); scan rate = 100 mV S<sup>-1</sup>.

scan rate = 100 mV S<sup>-1</sup>.

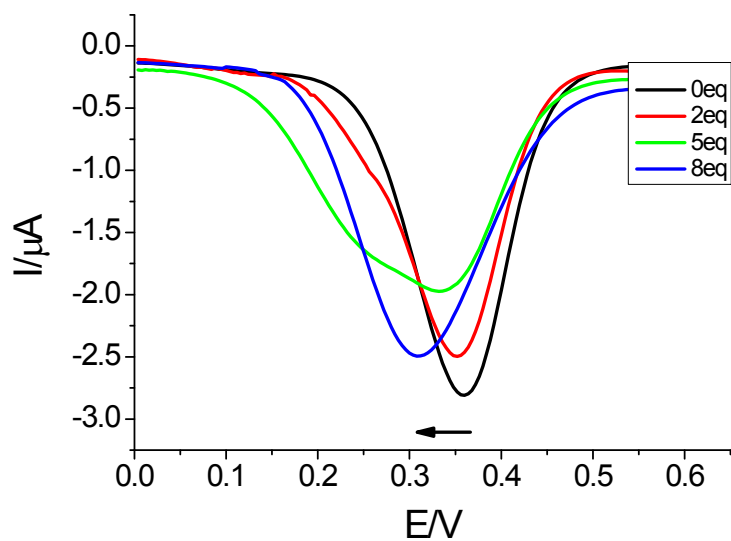

**Fig. S6** DPVs titration profile of **3** (0.2 mM) upon addition of various amount of AcO<sup>-</sup> in CH<sub>3</sub>CN solution. Reference electrode = Ag/AgNO<sub>3</sub>; supporting electrolyte = [n-Bu<sub>4</sub>N]PF<sub>6</sub> (0.1 M); scan rate = 100 mV S<sup>-1</sup>.

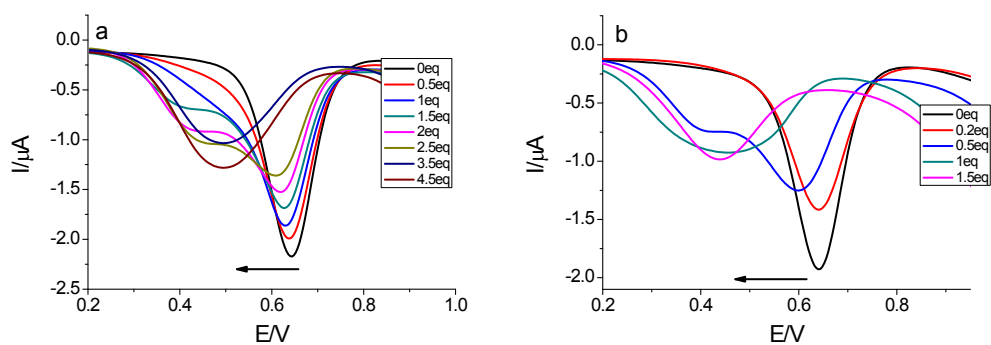

**Fig. S7** DPV titration profile of **4** (0.2 mM) upon addition of various amount of F<sup>-</sup> (left) and Pi (right) in CH<sub>3</sub>CN/DMF (9:1, V/V) solution. Reference electrode = Ag/AgNO<sub>3</sub>; supporting electrolyte = [n-Bu<sub>4</sub>N]PF<sub>6</sub> (0.1 M); scan rate = 100 mV S<sup>-1</sup>

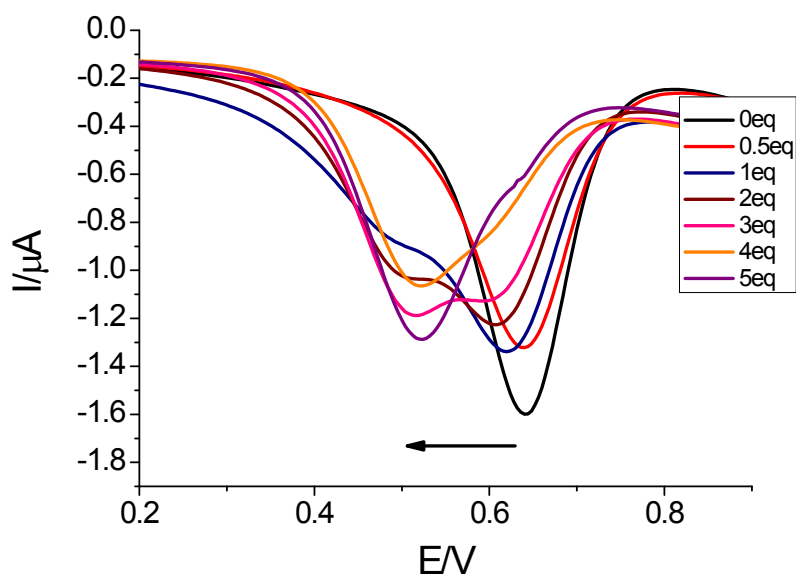

**Fig. S8** DPV titration profile of **4** (0.2 mM) upon addition of various amount of  $\text{AcO}^-$  in  $\text{CH}_3\text{CN}/\text{DMF}$  (9:1, V/V) solution. Reference electrode =  $\text{Ag}/\text{AgNO}_3$ ; supporting electrolyte =  $[\text{n-Bu}_4\text{N}]\text{PF}_6$  (0.1 M); scan rate =  $100 \text{ mV S}^{-1}$

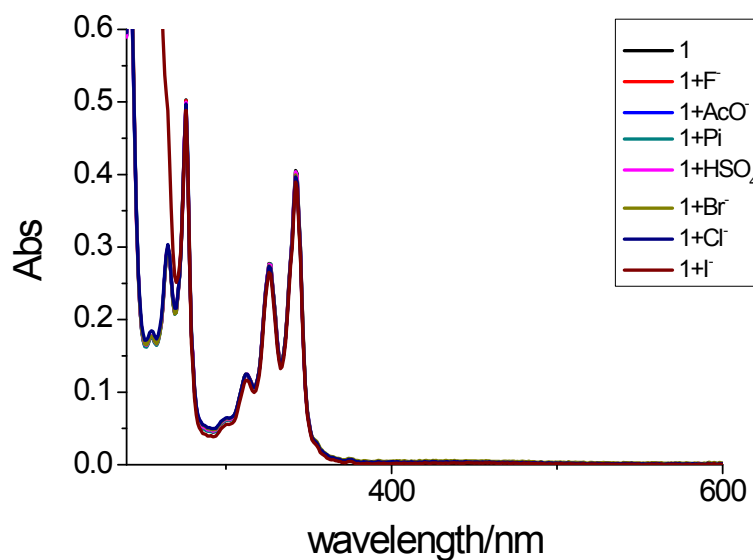

**Fig. S9** The absorption spectra of **1** upon addition various anions (30 equiv) in  $\text{CH}_3\text{CN}$  solution.

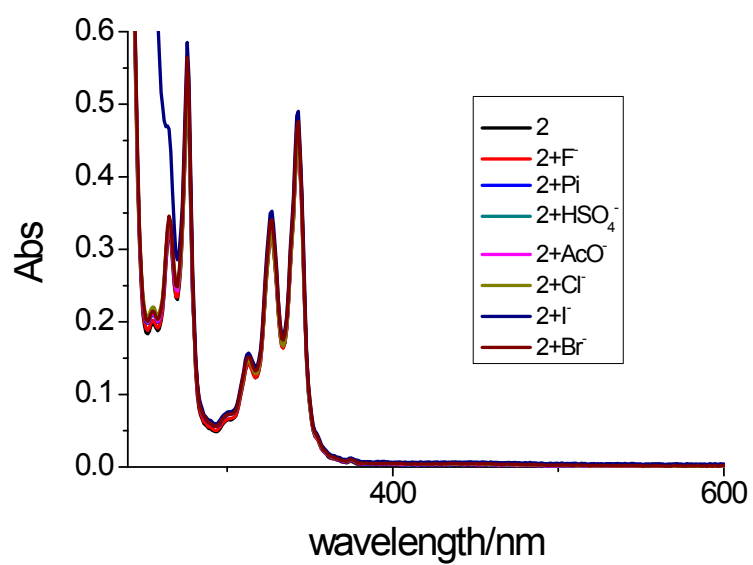

**Fig. S10** The absorption spectra of **2** upon addition various anions (20 equiv) in CH<sub>3</sub>CN solution.

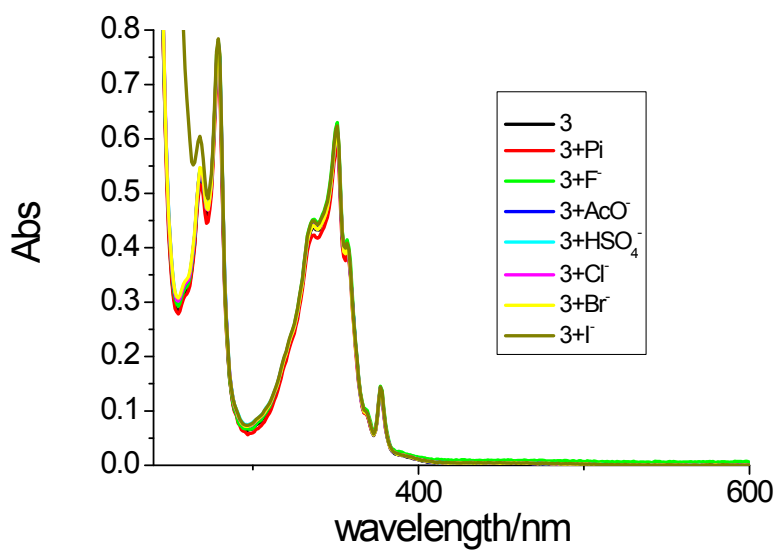

**Fig. S11** The absorption spectra of **3** upon addition various anions (30 equiv) in CH<sub>3</sub>CN solution.

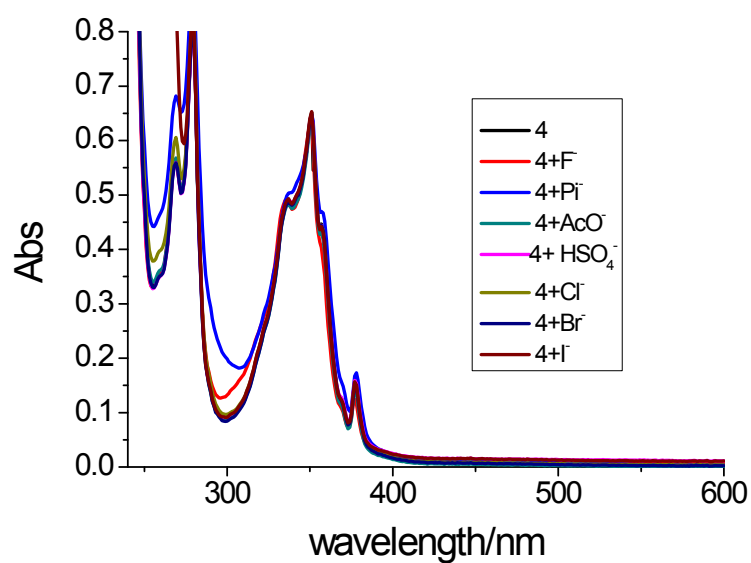

**Fig. S12** The absorption spectra of **4** upon addition various anions (20 equiv) in CH<sub>3</sub>CN solution.

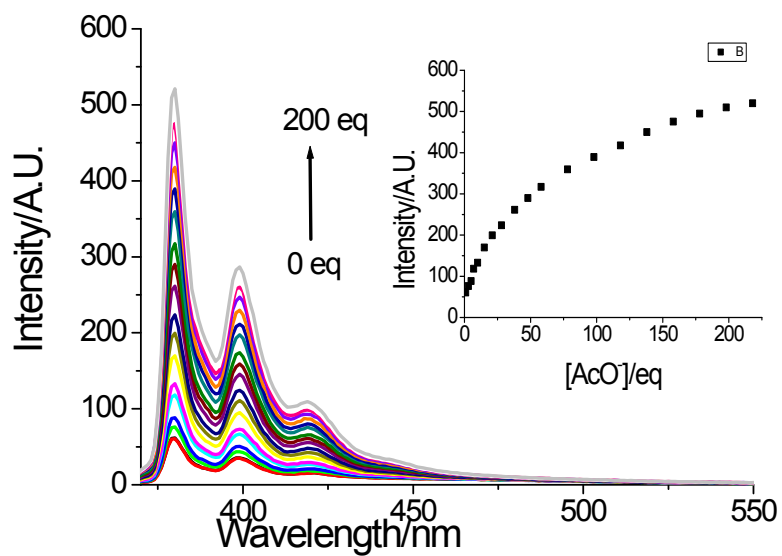

**Fig. S13** Emission titration spectra of **3** (20 μM) in CH<sub>3</sub>CN solution upon addition AcO<sup>-</sup> (1-200eq). Inset : Fluorescence spectra changes of **3** at 380 nm upon the addition of various amount of AcO<sup>-</sup> in CH<sub>3</sub>CN solution.

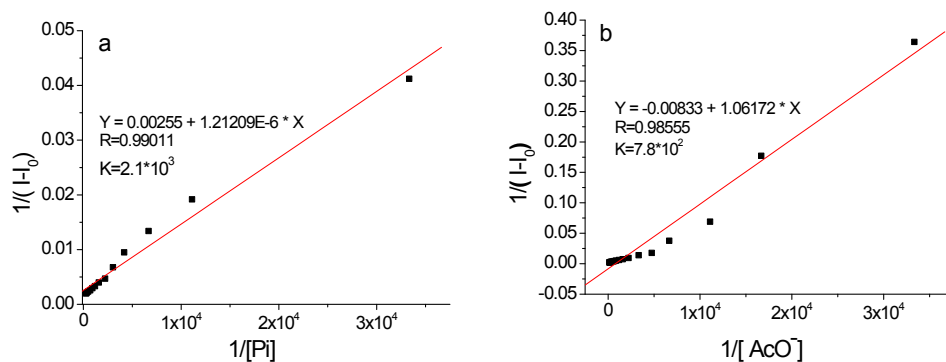

**Fig. S14** the Benesi-Hildebrand plot for 1:1 complexation of **3** with Pi (a) and AcO<sup>-</sup> (b) in CH<sub>3</sub>CN solution

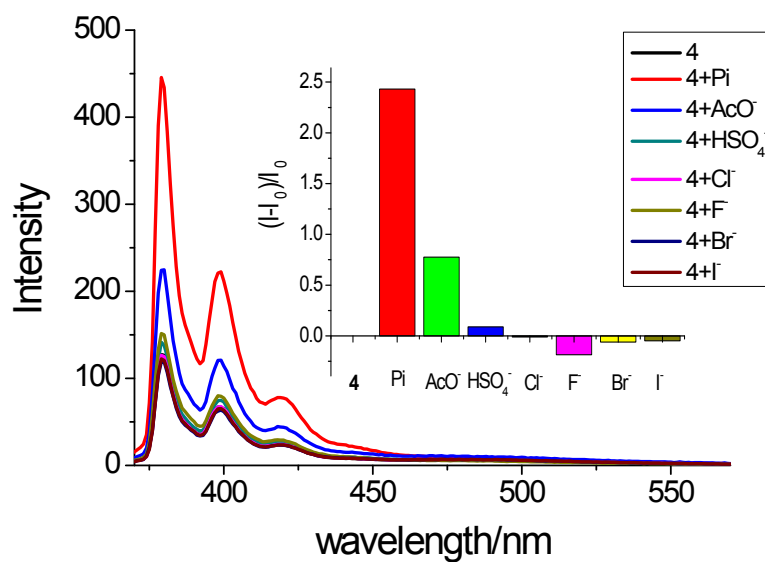

**Fig. S15** The emission spectra of **4** upon addition various anions (20 equiv) in CH<sub>3</sub>CN solution ( $\lambda_{exc} = 360$  nm). Inset: shows the emission intensity at 380 nm upon the addition of various anions.

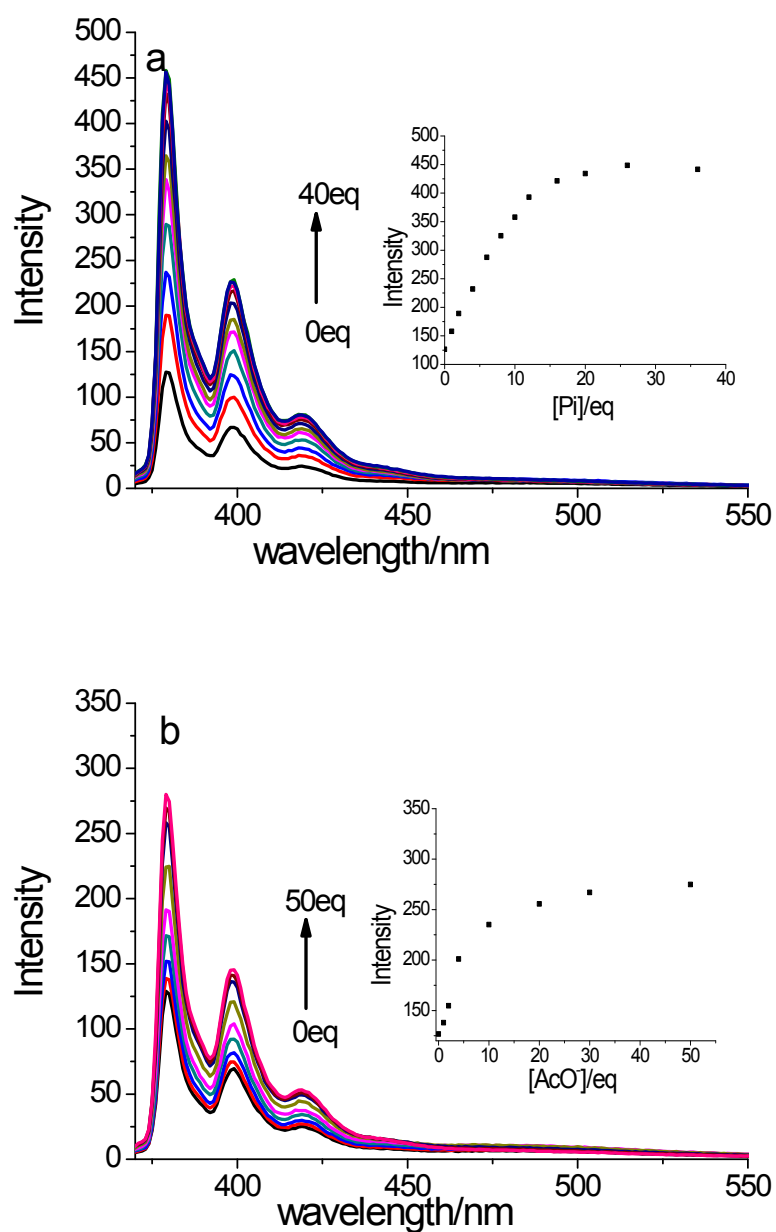

**Fig. S16** (a) Emission titration spectra of **4** (20  $\mu\text{M}$ ) in  $\text{CH}_3\text{CN}$  solution upon addition  $\text{H}_2\text{PO}_4^-$  (0–40 eq) with excitation at 360 nm. Inset: Fluorescence spectra changes of **4** at 380 nm upon the addition of various amount of  $\text{H}_2\text{PO}_4^-$  in  $\text{CH}_3\text{CN}$  solution; (b) Emission titration spectra of **4** (20  $\mu\text{M}$ ) in  $\text{CH}_3\text{CN}$  solution upon addition  $\text{AcO}^-$  (1–50 eq). Inset: Fluorescence spectra changes of **4** at 380 nm upon the addition of various amount of  $\text{AcO}^-$  in  $\text{CH}_3\text{CN}$  solution.



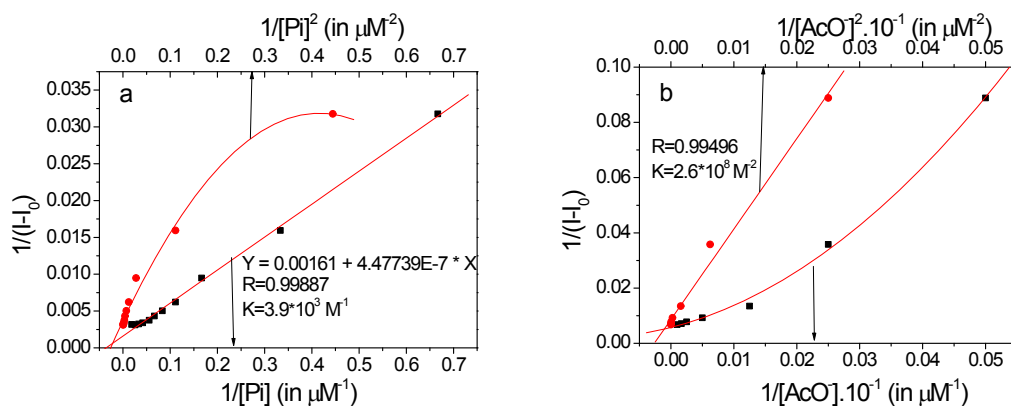

**Fig. S17. (a)** Benesi-Hildebrand plots using fluorescence data for the complexation of **4** with Pi in CH<sub>3</sub>CN. solid line (●) is for for 1:2 complexation; solid line (■) is for for 1:1 complexation.  $I$  and  $I_0$  are the fluorescence intensity of **4** in the presence and absence of Pi, respectively in CH<sub>3</sub>CN solution; **(b)** Benesi-Hildebrand plots using fluorescence data for the complexation of **4** with AcO<sup>-</sup> in CH<sub>3</sub>CN. solid line (●) is for for 1:2 complexation; solid line (■) is for for 1:1 complexation.  $I$  and  $I_0$  are the fluorescence intensity of **4** in the presence and absence of AcO<sup>-</sup>, respectively in CH<sub>3</sub>CN solution.

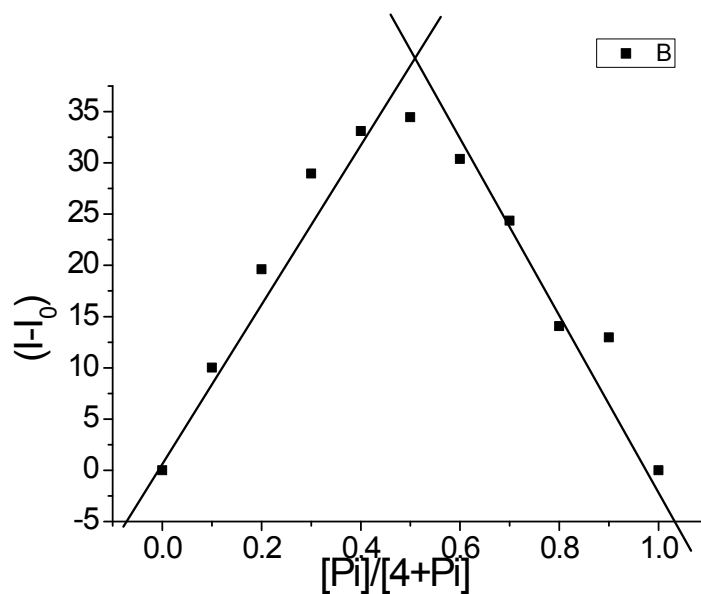

**Fig. S18** Job-plot of **4**-Pi.

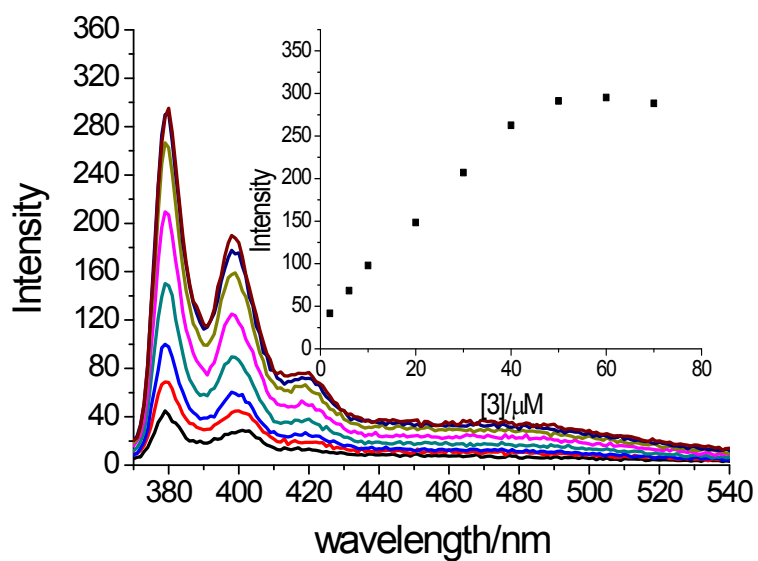

**Fig. S19** Fluorescence spectra changes of **3** upon the addition of various amount of **3** in CH<sub>3</sub>CN solution. Inset: Fluorescence spectra changes of **3** at 380 nm upon the addition of various amount of **3** in CH<sub>3</sub>CN solution.

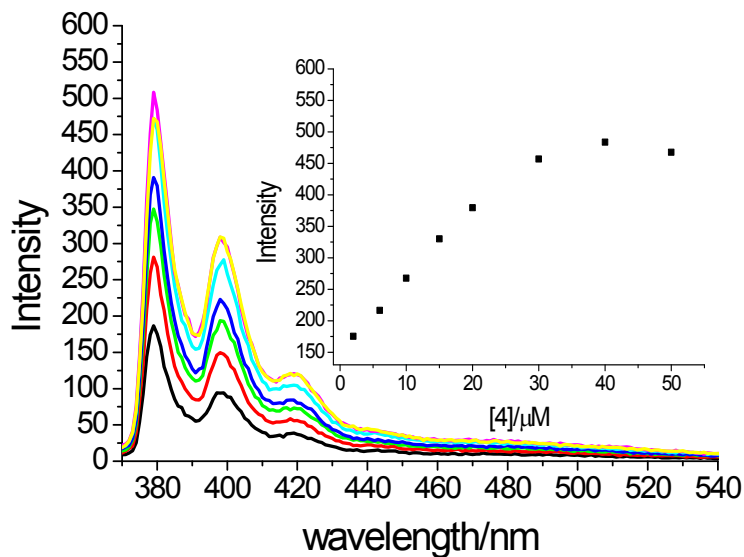

**Fig. S20** Fluorescence spectra changes of **4** upon the addition of various amount of **4** in CH<sub>3</sub>CN solution. Inset: Fluorescence spectra changes of **4** at 380 nm upon the addition of various amount of **4** in CH<sub>3</sub>CN solution.

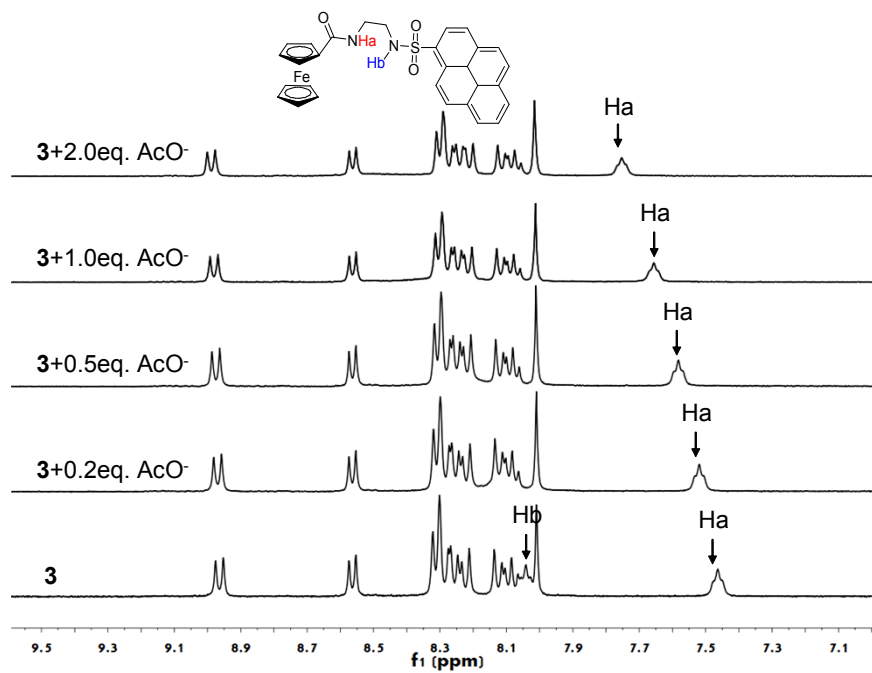

**Fig. S21** <sup>1</sup>H NMR spectra of **3** upon addition various amount of AcO<sup>-</sup> in DMSO-d<sub>6</sub> solution

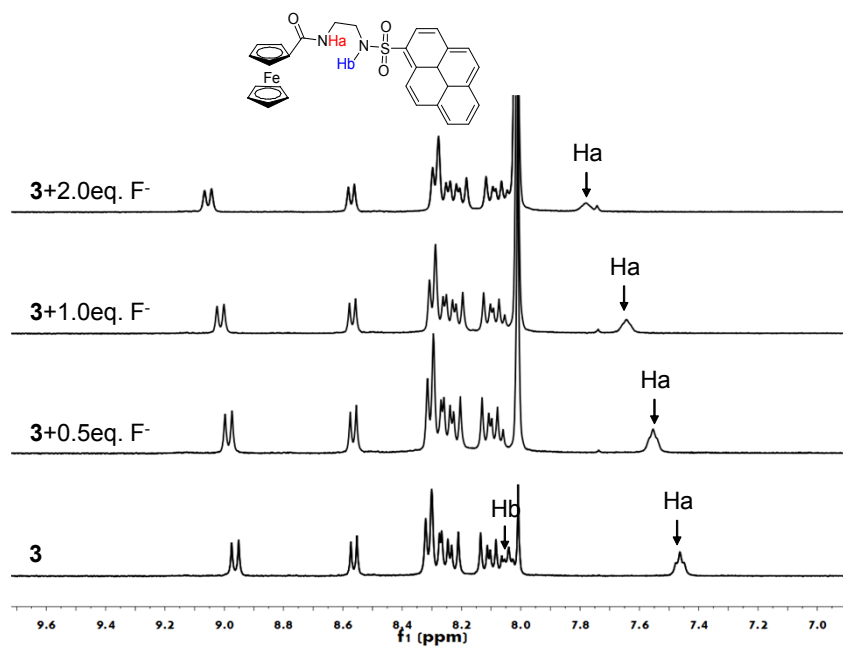

**Fig. S22** <sup>1</sup>H NMR spectra of **3** upon addition various amount of F<sup>-</sup> in DMSO-d<sub>6</sub> solution

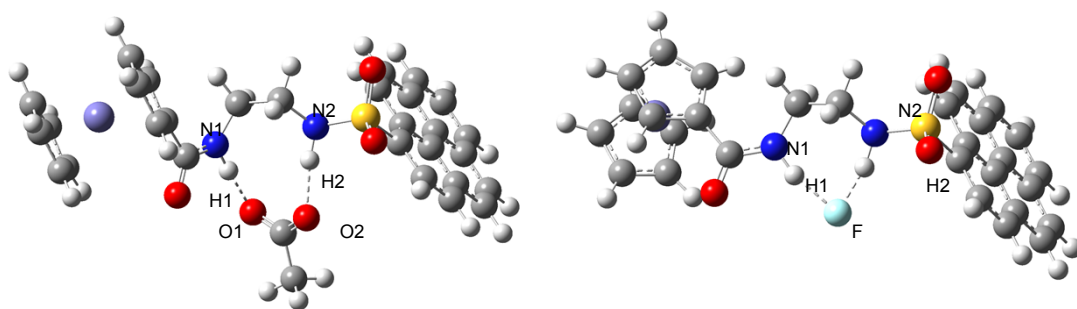

**Fig. S23** Calculated structure (B3LYP/6-31G<sup>\*</sup>) of **3**•CH<sub>3</sub>COO<sup>-</sup> (left) and **3**•F<sup>-</sup> (right) complexes. Nitrogen, oxygen, sulfur, carbon and hydrogen atoms are represented as blue, red, yellow, gray and white balls respectively. Selected bond and angles: N1–H1···O1, 1.853 Å, 173.15 °; N2–H2···O2, 1.782 Å, 172.23 °; N1–H1···F, 1.567 Å, 166.34 °; N2–H2···F, 1.713 Å, 165.71 °.

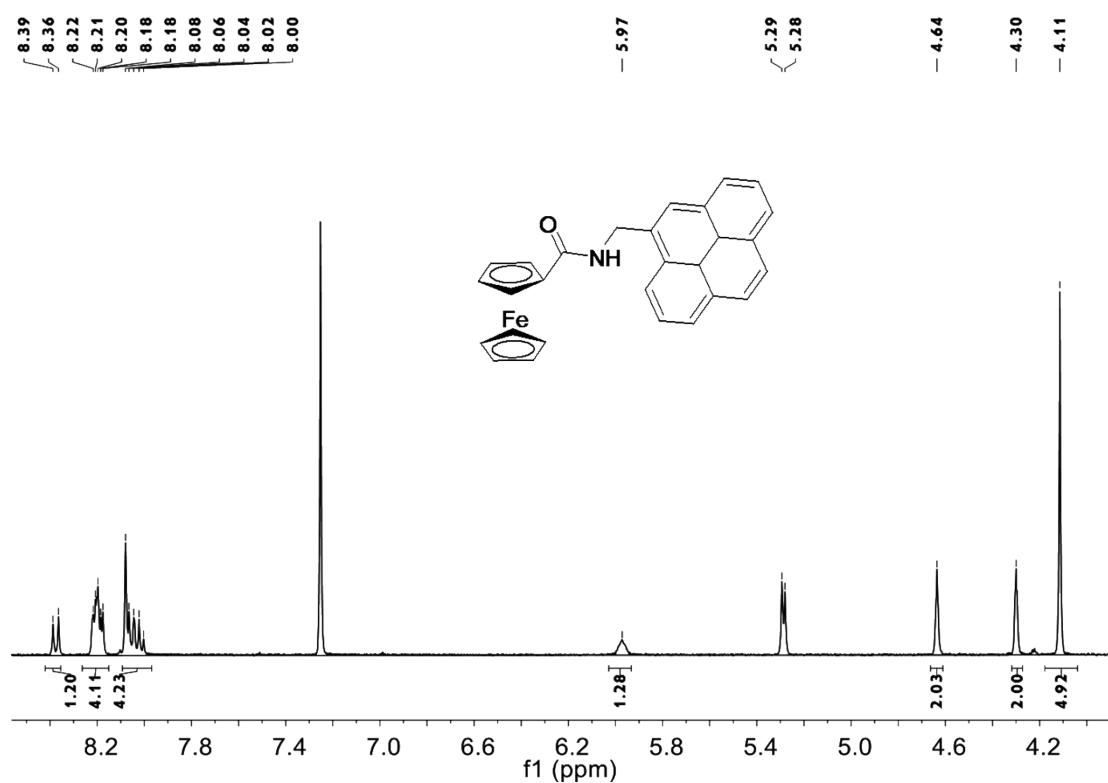

**Fig. S24** <sup>1</sup>H NMR spectrum of **1** in CDCl<sub>3</sub> solution

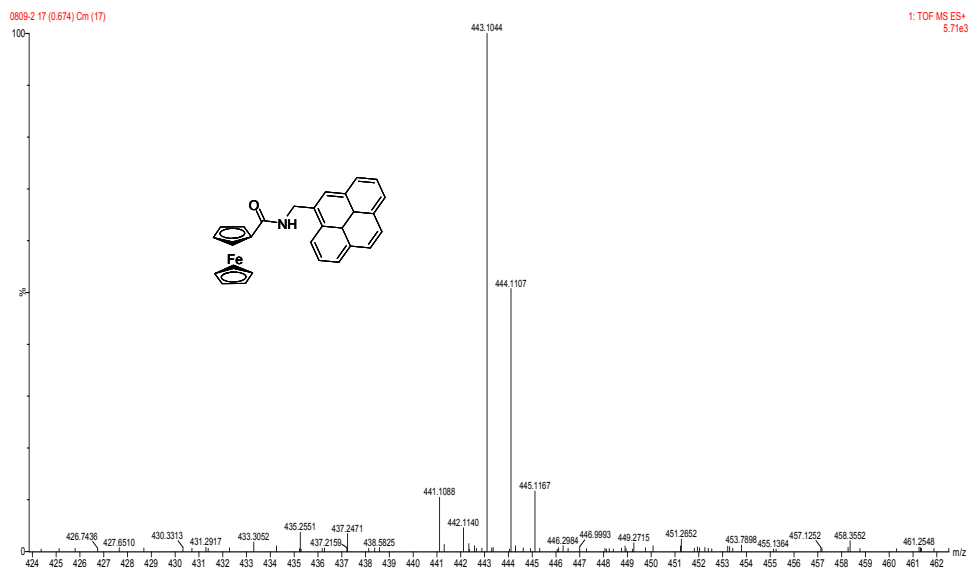

Fig. S25 ESI-MS (ES<sup>+</sup>) spectrum of **1**

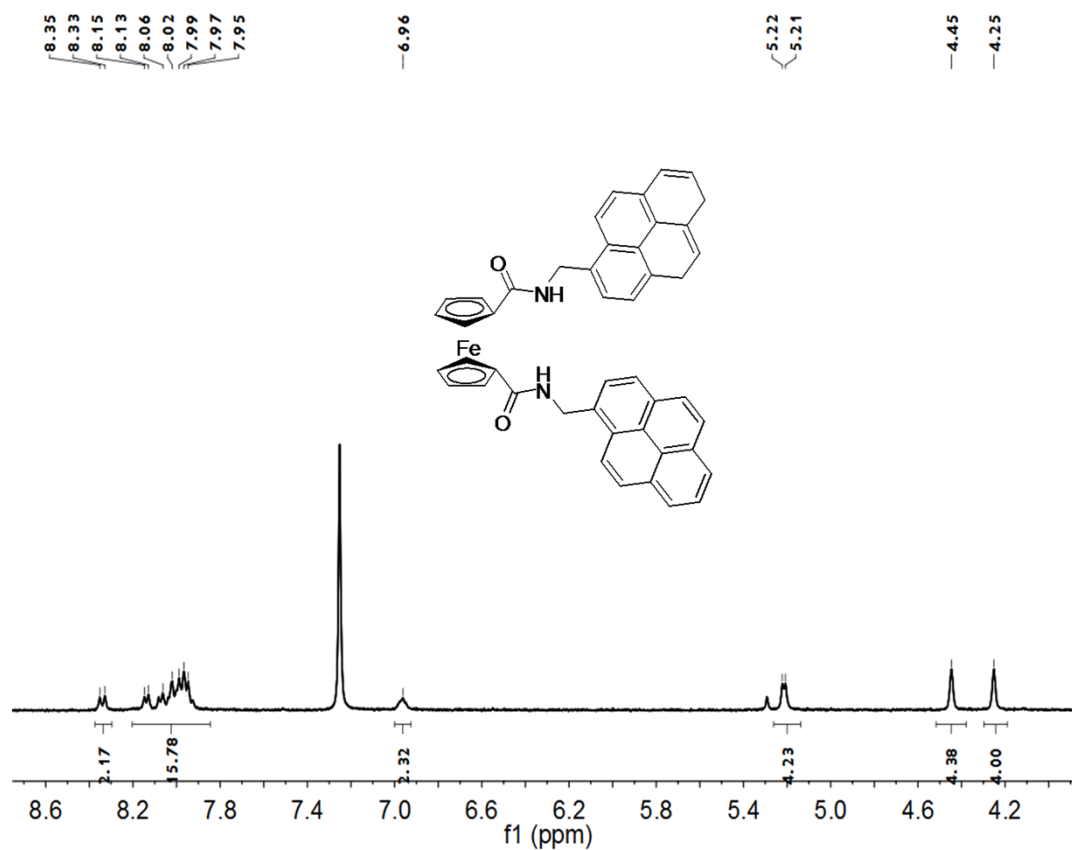

Fig. S26 <sup>1</sup>H NMR spectrum of **2** in CDCl<sub>3</sub> solution

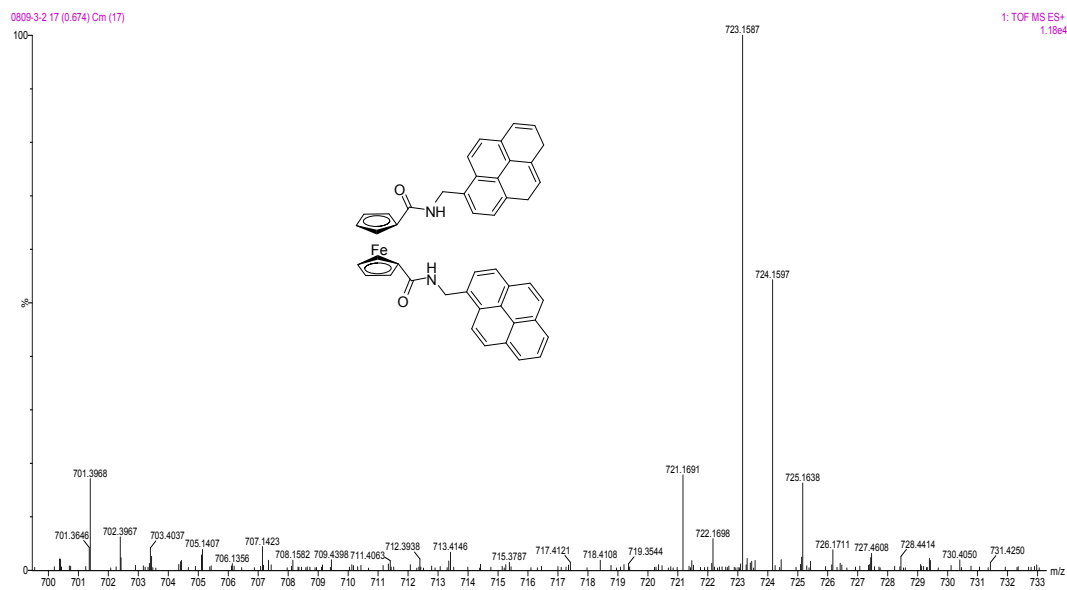

**Fig. S27** ESI-MS (ES<sup>+</sup>) spectrum of **2**

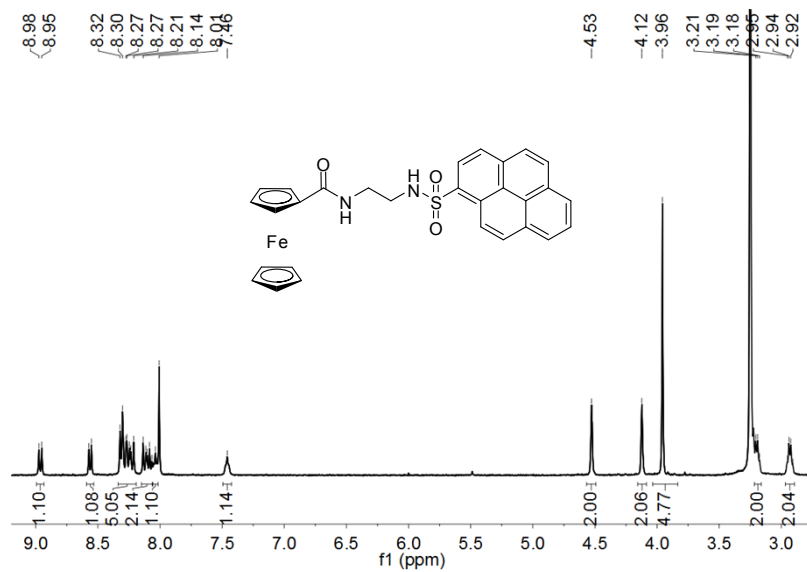

**Fig. S28** <sup>1</sup>H NMR spectrum of **3** in CDCl<sub>3</sub>/DMSO solution

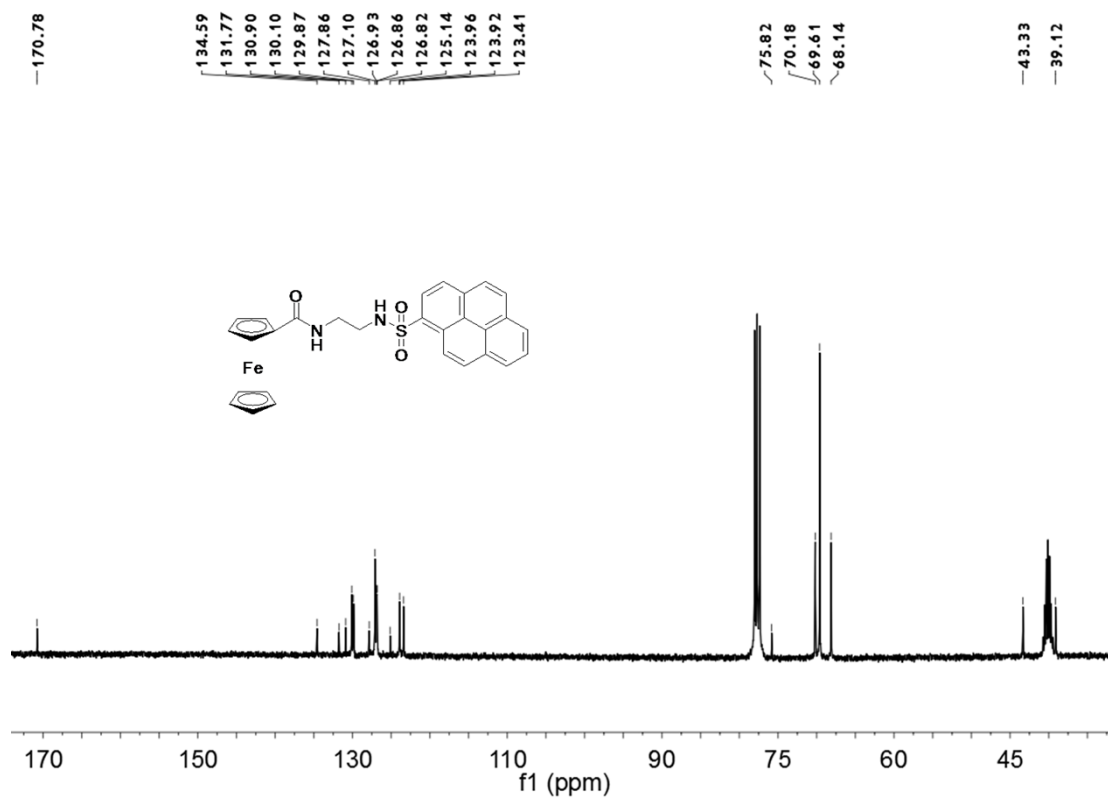

Fig. S29 <sup>13</sup>C NMR spectrum of **3** in CDCl<sub>3</sub>/DMSO solution

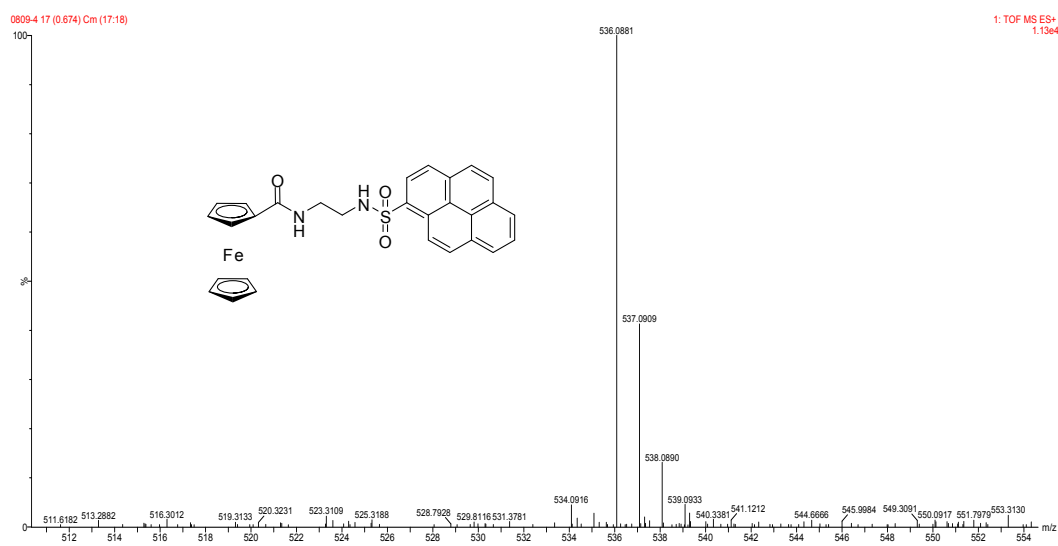

Fig. S30 ESI-MS (ES<sup>+</sup>) spectrum of **3**

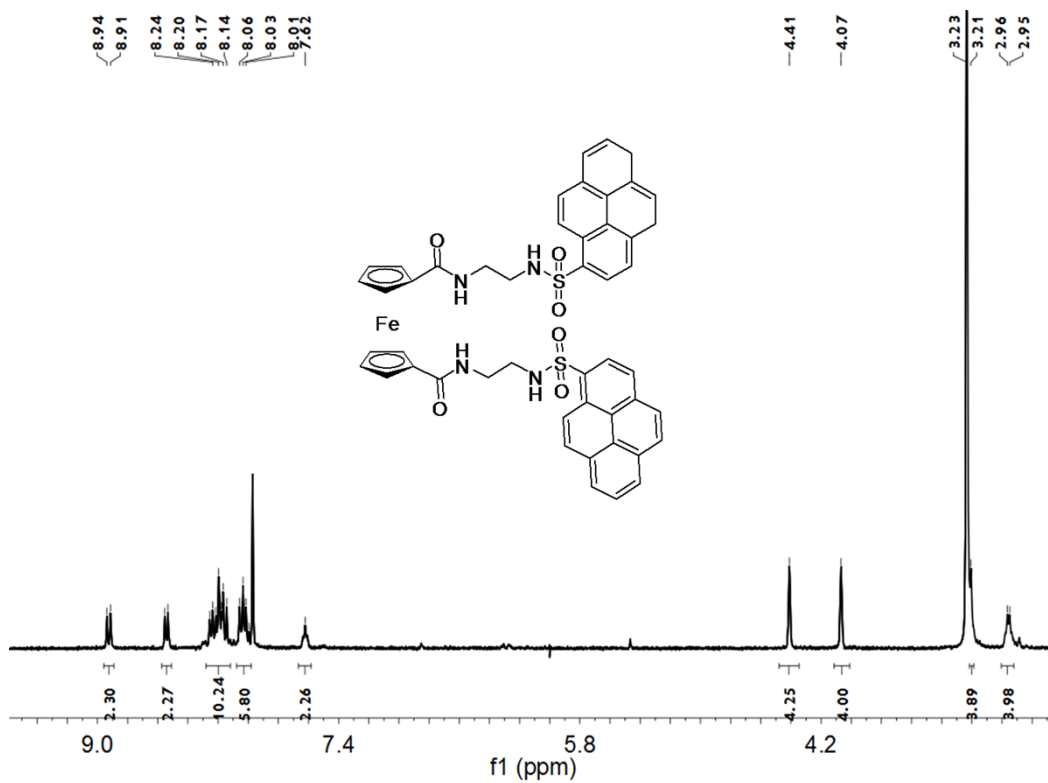

Fig. S31  $^1\text{H}$  NMR spectrum of 4 in  $\text{CDCl}_3/\text{DMSO}(1:1)$  solution

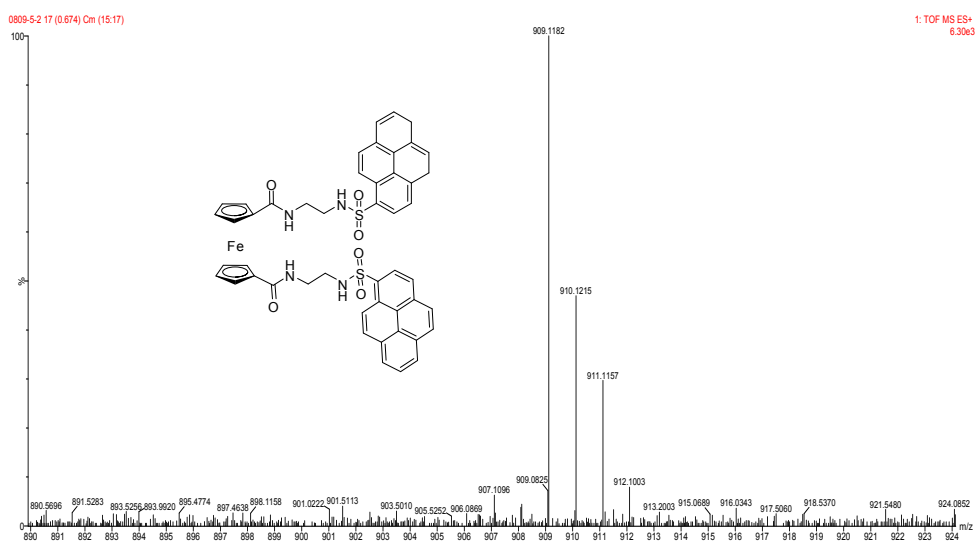

Fig. S32 ESI-MS ( $\text{ES}^+$ ) spectrum of 4
